# Supplementary material
Source: publisher figshare collection journal article supplement (https://acs.figshare.com/ndownloader/files/8229137)
Supplement: Supplementary file 1 [file 8229137]

 
data_Complex1 
 
_audit_creation_method            SHELXL-97 
_chemical_name_systematic 
; 
 ? 
; 
_chemical_name_common             ? 
_chemical_melting_point           ? 
_chemical_formula_moiety          'C7 H10 Gd O11, 3(H2 O)' 
_chemical_formula_sum 
 'C7 H16 Gd O14' 
_chemical_formula_weight          481.45 
 
loop_ 
 _atom_type_symbol 
 _atom_type_description 
 _atom_type_scat_dispersion_real 
 _atom_type_scat_dispersion_imag 
 _atom_type_scat_source 
 'C'  'C'   0.0033   0.0016 
 'International Tables Vol C Tables 4.2.6.8 and 6.1.1.4' 
 'H'  'H'   0.0000   0.0000 
 'International Tables Vol C Tables 4.2.6.8 and 6.1.1.4' 
 'O'  'O'   0.0106   0.0060 
 'International Tables Vol C Tables 4.2.6.8 and 6.1.1.4' 
 'Gd'  'Gd'  -0.1653   3.9035 
 'International Tables Vol C Tables 4.2.6.8 and 6.1.1.4' 
 
_symmetry_cell_setting            'Triclinic'  
_symmetry_space_group_name_H-M    'P -1' 
_symmetry_space_group_name_Hall    '-P 1'
loop_ 
 _symmetry_equiv_pos_as_xyz 
 'x, y, z' 
 '-x, -y, -z' 
 
_cell_length_a                    6.1139(4) 
_cell_length_b                    8.7718(5) 
_cell_length_c                    13.1543(8) 
_cell_angle_alpha                 101.048(2) 
_cell_angle_beta                  101.805(2) 
_cell_angle_gamma                 96.546(2) 
_cell_volume                      669.07(7) 
_cell_formula_units_Z             2 
_cell_measurement_temperature     120(2) 
_cell_measurement_reflns_used     1783 
_cell_measurement_theta_min       3.18 
_cell_measurement_theta_max       26.33 
 
_exptl_crystal_description        plate 
_exptl_crystal_colour             colorless
_exptl_crystal_size_max           0.42 
_exptl_crystal_size_mid           0.36 
_exptl_crystal_size_min           0.27 
_exptl_crystal_density_meas       ? 
_exptl_crystal_density_diffrn     2.390 
_exptl_crystal_density_method     'not measured' 
_exptl_crystal_F_000              468.0 
_exptl_absorpt_coefficient_mu     5.035 
_exptl_absorpt_correction_type    Multi-scan 
_exptl_absorpt_correction_T_min   0.139 
_exptl_absorpt_correction_T_max   0.257 
_exptl_absorpt_process_details    SADABS 
 
_exptl_special_details 
; 
 ? 
; 
 
_diffrn_ambient_temperature       120(2) 
_diffrn_radiation_wavelength      0.71073 
_diffrn_radiation_type            MoK\a 
_diffrn_radiation_source          'fine-focus sealed tube' 
_diffrn_radiation_monochromator   graphite 
_diffrn_measurement_device_type   'Bruker APEX-II CCD' 
_diffrn_measurement_method        '\f and \w scans'
_diffrn_detector_area_resol_mean  ? 
_diffrn_reflns_number             2744 
_diffrn_reflns_av_R_equivalents   0.0000 
_diffrn_reflns_av_sigmaI/netI     0.0302 
_diffrn_reflns_limit_h_min        -7 
_diffrn_reflns_limit_h_max        7 
_diffrn_reflns_limit_k_min        -10 
_diffrn_reflns_limit_k_max        10 
_diffrn_reflns_limit_l_min        0 
_diffrn_reflns_limit_l_max        16 
_diffrn_reflns_theta_min          2.40 
_diffrn_reflns_theta_max          26.38 
_reflns_number_total              2744 
_reflns_number_gt                 2520 
_reflns_threshold_expression      >2sigma(I) 
       
_computing_data_collection       'Bruker APEX2'
_computing_cell_refinement       'Bruker SAINT'
_computing_data_reduction        'Bruker SAINT'
_computing_structure_solution    'SHELXS-97 (Sheldrick 2008)'
_computing_structure_refinement  'SHELXL-2014 (Sheldrick 2014)'
_computing_molecular_graphics    'Bruker SHELXTL'
_computing_publication_material  'Bruker SHELXTL' 
 
_refine_special_details 
; 
 Refinement of F^2^ against ALL reflections.  The weighted R-factor wR and 
 goodness of fit S are based on F^2^, conventional R-factors R are based 
 on F, with F set to zero for negative F^2^. The threshold expression of 
 F^2^ > 2sigma(F^2^) is used only for calculating R-factors(gt) etc. and is 
 not relevant to the choice of reflections for refinement.  R-factors based 
 on F^2^ are statistically about twice as large as those based on F, and R- 
 factors based on ALL data will be even larger. 
; 
 
_refine_ls_structure_factor_coef  Fsqd  
_refine_ls_matrix_type            full 
_refine_ls_weighting_scheme       calc  
_refine_ls_weighting_details 
 'calc w=1/[\s^2^(Fo^2^)+(0.0250P)^2^+3.0138P] where P=(Fo^2^+2Fc^2^)/3' 
_atom_sites_solution_primary      direct 
_atom_sites_solution_secondary    difmap 
_atom_sites_solution_hydrogens    geom 
_refine_ls_hydrogen_treatment     mixed 
_refine_ls_extinction_method      none 
_refine_ls_extinction_coef        ? 
_refine_ls_number_reflns          2744 
_refine_ls_number_parameters      213 
_refine_ls_number_restraints      9 
_refine_ls_R_factor_all           0.0308 
_refine_ls_R_factor_gt            0.0255 
_refine_ls_wR_factor_ref          0.0599 
_refine_ls_wR_factor_gt           0.0552 
_refine_ls_goodness_of_fit_ref    1.078 
_refine_ls_restrained_S_all       1.082 
_refine_ls_shift/su_max           0.000 
_refine_ls_shift/su_mean          0.000 
 
loop_ 
 _atom_site_label 
 _atom_site_type_symbol 
 _atom_site_fract_x 
 _atom_site_fract_y 
 _atom_site_fract_z 
 _atom_site_U_iso_or_equiv 
 _atom_site_adp_type 
 _atom_site_occupancy 
 _atom_site_symmetry_multiplicity 
 _atom_site_calc_flag 
 _atom_site_refinement_flags 
 _atom_site_disorder_assembly 
 _atom_site_disorder_group 
Gd1 Gd 0.74716(4) 0.21931(3) 0.724571(17) 0.00839(8) Uani 1 1 d D . . 
O2 O 0.5017(5) -0.1998(4) 0.4515(2) 0.0139(7) Uani 1 1 d . . . 
O9 O 0.0650(5) 0.1066(4) 0.8005(2) 0.0115(7) Uani 1 1 d . . . 
O5 O 0.7669(5) 0.3569(4) 0.9097(2) 0.0124(7) Uani 1 1 d D . . 
H5 H 0.683(7) 0.330(4) 0.951(2) 0.019 Uiso 1 1 d D . . 
O4 O 1.0673(5) 0.4551(4) 0.8137(2) 0.0124(7) Uani 1 1 d D . . 
H4 H 1.173(5) 0.509(3) 0.791(3) 0.019 Uiso 1 1 d D . . 
O006 O 0.6595(5) 0.4792(4) 0.7124(2) 0.0134(7) Uani 1 1 d . . . 
O8 O 0.6302(5) 0.0290(4) 0.8293(2) 0.0113(7) Uani 1 1 d D . . 
H8 H 0.674(5) -0.064(2) 0.825(3) 0.017 Uiso 1 1 d D . . 
O6 O 0.5053(5) 0.2127(4) 1.0103(3) 0.0133(7) Uani 1 1 d . . . 
H6 H 0.4596 0.2464 1.0651 0.020 Uiso 1 1 calc R . . 
O10 O 0.6583(5) 0.7138(4) 0.8154(3) 0.0148(7) Uani 1 1 d . . . 
O7 O 0.3639(5) 0.2007(4) 0.7442(2) 0.0111(7) Uani 1 1 d . . . 
O1W O 0.2172(5) 0.6077(4) 0.6786(3) 0.0214(8) Uani 1 1 d G . . 
H1WA H 0.1508 0.5276 0.6271 0.032 Uiso 1 1 d G . . 
H1WB H 0.3605 0.6023 0.6973 0.032 Uiso 1 1 d G . . 
O3W O 0.8906(6) 0.1321(4) 0.4025(3) 0.0228(8) Uani 1 1 d G . . 
H3WA H 1.0165 0.1049 0.3897 0.034 Uiso 1 1 d G . . 
H3WB H 0.8758 0.2231 0.3871 0.034 Uiso 1 1 d G . . 
O3 O 0.9927(5) 0.2535(4) 0.6107(3) 0.0155(7) Uani 1 1 d . . . 
H3A H 0.9408 0.1871 0.5498 0.023 Uiso 1 1 d R . . 
H3B H 1.1265 0.2368 0.6398 0.023 Uiso 1 1 d R . . 
O1 O 0.6780(5) -0.0414(4) 0.6099(2) 0.0141(7) Uani 1 1 d . . . 
O2W O 0.2458(7) 0.4390(6) 0.4864(3) 0.0359(10) Uani 1 1 d G . . 
H2WA H 0.3772 0.4342 0.5253 0.054 Uiso 1 1 d G . . 
H2WB H 0.2628 0.4614 0.4266 0.054 Uiso 1 1 d G . . 
C7 C 0.4084(7) 0.0083(6) 0.8505(3) 0.0098(9) Uani 1 1 d D . . 
H7 H 0.3355 -0.1037 0.8203 0.012 Uiso 1 1 calc R . . 
C5 C 0.2678(7) 0.1152(5) 0.7940(3) 0.0092(9) Uani 1 1 d . . . 
C6 C 0.4172(7) 0.0479(5) 0.9704(3) 0.0067(9) Uani 1 1 d . . . 
H6A H 0.2624 0.0239 0.9830 0.008 Uiso 1 1 calc R . . 
C4 C 0.8955(7) 0.5079(5) 0.9587(3) 0.0101(9) Uani 1 1 d D . . 
H4A H 0.8006 0.5772 0.9937 0.012 Uiso 1 1 calc R . . 
C1 C 0.5503(8) -0.0714(6) 0.5177(4) 0.0125(10) Uani 1 1 d . . . 
C2 C 0.7436(7) 0.5913(6) 0.7916(4) 0.0119(9) Uani 1 1 d . . . 
C3 C 0.9607(8) 0.5717(6) 0.8674(4) 0.0128(10) Uani 1 1 d D . . 
H3 H 1.0660 0.6740 0.8947 0.015 Uiso 1 1 calc R . . 
 
loop_ 
 _atom_site_aniso_label 
 _atom_site_aniso_U_11 
 _atom_site_aniso_U_22 
 _atom_site_aniso_U_33 
 _atom_site_aniso_U_23 
 _atom_site_aniso_U_13 
 _atom_site_aniso_U_12 
Gd1 0.00529(11) 0.00966(13) 0.01071(12) 0.00239(8) 0.00210(8) 0.00256(8) 
O2 0.0136(16) 0.0138(18) 0.0147(16) 0.0021(14) 0.0032(13) 0.0054(14) 
O9 0.0055(14) 0.0157(18) 0.0152(16) 0.0052(13) 0.0038(12) 0.0044(13) 
O5 0.0135(16) 0.0121(17) 0.0107(15) 0.0013(13) 0.0049(13) -0.0039(13) 
O4 0.0095(15) 0.0125(17) 0.0164(16) 0.0016(13) 0.0067(13) 0.0033(13) 
O006 0.0125(16) 0.0127(18) 0.0135(16) 0.0020(13) 0.0001(13) 0.0026(13) 
O8 0.0082(15) 0.0121(17) 0.0167(16) 0.0054(13) 0.0057(13) 0.0056(13) 
O6 0.0151(16) 0.0112(17) 0.0144(16) 0.0014(13) 0.0062(13) 0.0033(13) 
O10 0.0175(16) 0.0119(18) 0.0190(17) 0.0059(14) 0.0078(14) 0.0077(14) 
O7 0.0072(14) 0.0145(17) 0.0127(15) 0.0043(13) 0.0030(12) 0.0023(13) 
O1W 0.0127(16) 0.026(2) 0.0260(19) 0.0070(16) 0.0033(15) 0.0031(15) 
O3W 0.0211(18) 0.024(2) 0.0240(19) 0.0030(16) 0.0059(15) 0.0099(16) 
O3 0.0089(15) 0.023(2) 0.0147(16) 0.0032(14) 0.0025(13) 0.0049(14) 
O1 0.0140(16) 0.0120(18) 0.0147(16) 0.0010(13) 0.0011(13) 0.0034(14) 
O2W 0.039(2) 0.042(3) 0.032(2) 0.014(2) 0.011(2) 0.012(2) 
C7 0.0045(19) 0.013(2) 0.013(2) 0.0055(18) 0.0020(17) 0.0032(18) 
C5 0.009(2) 0.009(2) 0.008(2) 0.0000(17) -0.0001(17) 0.0028(18) 
C6 0.0064(19) 0.006(2) 0.007(2) 0.0043(17) -0.0012(16) -0.0008(17) 
C4 0.008(2) 0.009(2) 0.011(2) -0.0023(17) 0.0014(18) 0.0002(17) 
C1 0.010(2) 0.017(3) 0.013(2) 0.0046(19) 0.0054(18) 0.0037(19) 
C2 0.011(2) 0.013(2) 0.014(2) 0.0063(19) 0.0047(18) 0.0030(19) 
C3 0.013(2) 0.011(2) 0.014(2) 0.0013(18) 0.0019(18) 0.0026(19) 
 
_geom_special_details 
; 
 All esds (except the esd in the dihedral angle between two l.s. planes) 
 are estimated using the full covariance matrix.  The cell esds are taken 
 into account individually in the estimation of esds in distances, angles 
 and torsion angles; correlations between esds in cell parameters are only 
 used when they are defined by crystal symmetry.  An approximate (isotropic) 
 treatment of cell esds is used for estimating esds involving l.s. planes. 
; 
 
loop_ 
 _geom_bond_atom_site_label_1 
 _geom_bond_atom_site_label_2 
 _geom_bond_distance 
 _geom_bond_site_symmetry_2 
 _geom_bond_publ_flag 
Gd1 O3 2.361(3) . ? 
Gd1 O7 2.400(3) . ? 
Gd1 O9 2.403(3) 1_655 ? 
Gd1 O1 2.425(3) . ? 
Gd1 O006 2.428(3) . ? 
Gd1 O2 2.460(3) 2_656 ? 
Gd1 O5 2.474(3) . ? 
Gd1 O8 2.491(3) . ? 
Gd1 O4 2.587(3) . ? 
O2 C1 1.248(6) . ? 
O2 Gd1 2.460(3) 2_656 ? 
O9 C5 1.255(5) . ? 
O9 Gd1 2.403(3) 1_455 ? 
O5 C4 1.421(5) . ? 
O5 H5 0.869(9) . ? 
O4 C3 1.425(5) . ? 
O4 H4 0.889(10) . ? 
O006 C2 1.260(6) . ? 
O8 C7 1.438(5) . ? 
O8 H8 0.882(10) . ? 
O6 C6 1.440(5) . ? 
O6 H6 0.8400 . ? 
O10 C2 1.261(5) . ? 
O7 C5 1.258(6) . ? 
O1W H1WA 0.8701 . ? 
O1W H1WB 0.8700 . ? 
O3W H3WA 0.8700 . ? 
O3W H3WB 0.8699 . ? 
O3 H3A 0.8705 . ? 
O3 H3B 0.8706 . ? 
O1 C1 1.262(5) . ? 
O2W H2WA 0.8700 . ? 
O2W H2WB 0.8699 . ? 
C7 C5 1.537(6) . ? 
C7 C6 1.537(6) . ? 
C7 H7 1.0000 . ? 
C6 C6 1.568(8) 2_657 ? 
C6 H6A 1.0000 . ? 
C4 C3 1.522(7) . ? 
C4 C4 1.537(8) 2_767 ? 
C4 H4A 1.0000 . ? 
C1 C1 1.563(9) 2_656 ? 
C2 C3 1.537(6) . ? 
C3 H3 1.0000 . ? 
 
loop_ 
 _geom_angle_atom_site_label_1 
 _geom_angle_atom_site_label_2 
 _geom_angle_atom_site_label_3 
 _geom_angle 
 _geom_angle_site_symmetry_1 
 _geom_angle_site_symmetry_3 
 _geom_angle_publ_flag 
O3 Gd1 O7 146.11(11) . . ? 
O3 Gd1 O9 78.04(11) . 1_655 ? 
O7 Gd1 O9 132.63(11) . 1_655 ? 
O3 Gd1 O1 78.84(12) . . ? 
O7 Gd1 O1 92.74(11) . . ? 
O9 Gd1 O1 77.83(10) 1_655 . ? 
O3 Gd1 O006 87.05(11) . . ? 
O7 Gd1 O006 77.36(11) . . ? 
O9 Gd1 O006 137.68(11) 1_655 . ? 
O1 Gd1 O006 137.87(11) . . ? 
O3 Gd1 O2 74.61(11) . 2_656 ? 
O7 Gd1 O2 71.97(11) . 2_656 ? 
O9 Gd1 O2 138.22(10) 1_655 2_656 ? 
O1 Gd1 O2 66.38(11) . 2_656 ? 
O006 Gd1 O2 71.63(10) . 2_656 ? 
O3 Gd1 O5 130.82(11) . . ? 
O7 Gd1 O5 73.85(10) . . ? 
O9 Gd1 O5 85.58(10) 1_655 . ? 
O1 Gd1 O5 142.05(11) . . ? 
O006 Gd1 O5 74.70(11) . . ? 
O2 Gd1 O5 136.11(10) 2_656 . ? 
O3 Gd1 O8 140.32(11) . . ? 
O7 Gd1 O8 63.49(10) . . ? 
O9 Gd1 O8 69.43(10) 1_655 . ? 
O1 Gd1 O8 72.72(11) . . ? 
O006 Gd1 O8 132.47(10) . . ? 
O2 Gd1 O8 116.38(11) 2_656 . ? 
O5 Gd1 O8 69.52(11) . . ? 
O3 Gd1 O4 69.40(11) . . ? 
O7 Gd1 O4 125.89(10) . . ? 
O9 Gd1 O4 74.58(11) 1_655 . ? 
O1 Gd1 O4 141.35(10) . . ? 
O006 Gd1 O4 63.10(10) . . ? 
O2 Gd1 O4 122.31(11) 2_656 . ? 
O5 Gd1 O4 61.56(10) . . ? 
O8 Gd1 O4 120.27(10) . . ? 
C1 O2 Gd1 119.7(3) . 2_656 ? 
C5 O9 Gd1 134.8(3) . 1_455 ? 
C4 O5 Gd1 124.0(3) . . ? 
C4 O5 H5 108.7(14) . . ? 
Gd1 O5 H5 126.7(15) . . ? 
C3 O4 Gd1 105.0(2) . . ? 
C3 O4 H4 105.0(17) . . ? 
Gd1 O4 H4 134.7(19) . . ? 
C2 O006 Gd1 117.9(3) . . ? 
C7 O8 Gd1 122.9(3) . . ? 
C7 O8 H8 105.5(16) . . ? 
Gd1 O8 H8 123.0(16) . . ? 
C6 O6 H6 109.5 . . ? 
C5 O7 Gd1 128.0(3) . . ? 
H1WA O1W H1WB 109.5 . . ? 
H3WA O3W H3WB 109.5 . . ? 
Gd1 O3 H3A 109.5 . . ? 
Gd1 O3 H3B 109.3 . . ? 
H3A O3 H3B 109.4 . . ? 
C1 O1 Gd1 121.3(3) . . ? 
H2WA O2W H2WB 109.5 . . ? 
O8 C7 C5 108.0(4) . . ? 
O8 C7 C6 112.1(3) . . ? 
C5 C7 C6 110.2(3) . . ? 
O8 C7 H7 108.9 . . ? 
C5 C7 H7 108.9 . . ? 
C6 C7 H7 108.9 . . ? 
O9 C5 O7 126.0(4) . . ? 
O9 C5 C7 116.4(4) . . ? 
O7 C5 C7 117.6(4) . . ? 
O6 C6 C7 107.8(4) . . ? 
O6 C6 C6 108.1(4) . 2_657 ? 
C7 C6 C6 110.0(4) . 2_657 ? 
O6 C6 H6A 110.3 . . ? 
C7 C6 H6A 110.3 . . ? 
C6 C6 H6A 110.3 2_657 . ? 
O5 C4 C3 104.6(3) . . ? 
O5 C4 C4 109.8(5) . 2_767 ? 
C3 C4 C4 111.9(5) . 2_767 ? 
O5 C4 H4A 110.1 . . ? 
C3 C4 H4A 110.1 . . ? 
C4 C4 H4A 110.1 2_767 . ? 
O2 C1 O1 127.4(4) . . ? 
O2 C1 C1 117.1(5) . 2_656 ? 
O1 C1 C1 115.5(5) . 2_656 ? 
O006 C2 O10 125.1(4) . . ? 
O006 C2 C3 116.7(4) . . ? 
O10 C2 C3 118.0(4) . . ? 
O4 C3 C4 106.1(4) . . ? 
O4 C3 C2 109.6(4) . . ? 
C4 C3 C2 108.5(4) . . ? 
O4 C3 H3 110.8 . . ? 
C4 C3 H3 110.8 . . ? 
C2 C3 H3 110.8 . . ? 
 
loop_ 
 _geom_torsion_atom_site_label_1 
 _geom_torsion_atom_site_label_2 
 _geom_torsion_atom_site_label_3 
 _geom_torsion_atom_site_label_4 
 _geom_torsion 
 _geom_torsion_site_symmetry_1 
 _geom_torsion_site_symmetry_2 
 _geom_torsion_site_symmetry_3 
 _geom_torsion_site_symmetry_4 
 _geom_torsion_publ_flag 
O3 Gd1 O5 C4 20.7(4) . . . . ? 
O7 Gd1 O5 C4 -132.4(3) . . . . ? 
O9 Gd1 O5 C4 90.8(3) 1_655 . . . ? 
O1 Gd1 O5 C4 154.5(3) . . . . ? 
O006 Gd1 O5 C4 -51.4(3) . . . . ? 
O2 Gd1 O5 C4 -92.4(3) 2_656 . . . ? 
O8 Gd1 O5 C4 160.4(3) . . . . ? 
O4 Gd1 O5 C4 15.9(3) . . . . ? 
O3 Gd1 O4 C3 140.6(3) . . . . ? 
O7 Gd1 O4 C3 -4.7(3) . . . . ? 
O9 Gd1 O4 C3 -136.6(3) 1_655 . . . ? 
O1 Gd1 O4 C3 177.4(2) . . . . ? 
O006 Gd1 O4 C3 43.2(3) . . . . ? 
O2 Gd1 O4 C3 85.6(3) 2_656 . . . ? 
O5 Gd1 O4 C3 -43.2(3) . . . . ? 
O8 Gd1 O4 C3 -82.2(3) . . . . ? 
O3 Gd1 O006 C2 -105.2(3) . . . . ? 
O7 Gd1 O006 C2 105.1(3) . . . . ? 
O9 Gd1 O006 C2 -36.6(4) 1_655 . . . ? 
O1 Gd1 O006 C2 -175.0(3) . . . . ? 
O2 Gd1 O006 C2 -180.0(3) 2_656 . . . ? 
O5 Gd1 O006 C2 28.6(3) . . . . ? 
O8 Gd1 O006 C2 70.7(4) . . . . ? 
O4 Gd1 O006 C2 -36.9(3) . . . . ? 
O3 Gd1 O8 C7 -150.3(3) . . . . ? 
O7 Gd1 O8 C7 -1.9(3) . . . . ? 
O9 Gd1 O8 C7 172.7(3) 1_655 . . . ? 
O1 Gd1 O8 C7 -104.1(3) . . . . ? 
O006 Gd1 O8 C7 36.1(3) . . . . ? 
O2 Gd1 O8 C7 -52.6(3) 2_656 . . . ? 
O5 Gd1 O8 C7 79.7(3) . . . . ? 
O4 Gd1 O8 C7 115.9(3) . . . . ? 
O3 Gd1 O7 C5 143.9(3) . . . . ? 
O9 Gd1 O7 C5 -6.0(4) 1_655 . . . ? 
O1 Gd1 O7 C5 70.0(3) . . . . ? 
O006 Gd1 O7 C5 -151.4(4) . . . . ? 
O2 Gd1 O7 C5 134.0(4) 2_656 . . . ? 
O5 Gd1 O7 C5 -73.9(3) . . . . ? 
O8 Gd1 O7 C5 0.8(3) . . . . ? 
O4 Gd1 O7 C5 -108.7(3) . . . . ? 
O3 Gd1 O1 C1 -79.3(3) . . . . ? 
O7 Gd1 O1 C1 67.6(3) . . . . ? 
O9 Gd1 O1 C1 -159.3(3) 1_655 . . . ? 
O006 Gd1 O1 C1 -6.5(4) . . . . ? 
O2 Gd1 O1 C1 -1.3(3) 2_656 . . . ? 
O5 Gd1 O1 C1 134.6(3) . . . . ? 
O8 Gd1 O1 C1 128.8(3) . . . . ? 
O4 Gd1 O1 C1 -114.1(3) . . . . ? 
Gd1 O8 C7 C5 2.6(4) . . . . ? 
Gd1 O8 C7 C6 -118.9(3) . . . . ? 
Gd1 O9 C5 O7 4.1(7) 1_455 . . . ? 
Gd1 O9 C5 C7 -174.7(3) 1_455 . . . ? 
Gd1 O7 C5 O9 -178.5(3) . . . . ? 
Gd1 O7 C5 C7 0.2(5) . . . . ? 
O8 C7 C5 O9 177.1(4) . . . . ? 
C6 C7 C5 O9 -60.3(5) . . . . ? 
O8 C7 C5 O7 -1.8(5) . . . . ? 
C6 C7 C5 O7 120.9(4) . . . . ? 
O8 C7 C6 O6 64.2(4) . . . . ? 
C5 C7 C6 O6 -56.0(4) . . . . ? 
O8 C7 C6 C6 -53.4(6) . . . 2_657 ? 
C5 C7 C6 C6 -173.7(4) . . . 2_657 ? 
Gd1 O5 C4 C3 12.8(4) . . . . ? 
Gd1 O5 C4 C4 -107.4(4) . . . 2_767 ? 
Gd1 O2 C1 O1 -178.6(4) 2_656 . . . ? 
Gd1 O2 C1 C1 -0.8(7) 2_656 . . 2_656 ? 
Gd1 O1 C1 O2 180.0(4) . . . . ? 
Gd1 O1 C1 C1 2.1(6) . . . 2_656 ? 
Gd1 O006 C2 O10 -152.9(4) . . . . ? 
Gd1 O006 C2 C3 23.9(5) . . . . ? 
Gd1 O4 C3 C4 68.7(3) . . . . ? 
Gd1 O4 C3 C2 -48.3(4) . . . . ? 
O5 C4 C3 O4 -53.8(4) . . . . ? 
C4 C4 C3 O4 65.0(5) 2_767 . . . ? 
O5 C4 C3 C2 63.9(4) . . . . ? 
C4 C4 C3 C2 -177.3(4) 2_767 . . . ? 
O006 C2 C3 O4 20.3(6) . . . . ? 
O10 C2 C3 O4 -162.7(4) . . . . ? 
O006 C2 C3 C4 -95.1(5) . . . . ? 
O10 C2 C3 C4 81.9(5) . . . . ? 
 
_diffrn_measured_fraction_theta_max    0.989 
_diffrn_reflns_theta_full              26.38 
_diffrn_measured_fraction_theta_full   0.989 
_refine_diff_density_max    1.204 
_refine_diff_density_min   -0.903 
_refine_diff_density_rms    0.162 
